# Supplementary material for: Management of patellar tendinopathy: a systematic review and network meta-analysis of randomised studies
Source: PubMed Central journal article supplement (PMC8634001; doi:10.1136/bmjsem-2021-001110), 2021-11-29

## Supplementary material

| Study                          | Population (mean age)            | Mean DOS (range) | Interventions                                                                                                    | Duration of treatment     | Follow up        | Pain score                           | Function score |
|--------------------------------|----------------------------------|------------------|------------------------------------------------------------------------------------------------------------------|---------------------------|------------------|--------------------------------------|----------------|
| <b>Abat et al. (2016)</b>      | N=64 athletes (31y)              | 29.2m            | 1)Electro-physiotherapy + eccentric exercise n=32<br>2)US-guided galvanic electrolysis + eccentric exercise n=32 | 8 weeks                   | 0, 8w            | -                                    | VISA-P (0-100) |
| <b>Agergaard et al. (2021)</b> | N=44 athletes (30.6y)            | 7.1m (3-12m)     | 1)Moderate, slow resistance exercise n=23<br>2)Heavy slow resistance exercise n=21                               | Exercise for 12 weeks     | 0, 12w, 52w      | NRS (0-10) – during sports           | VISA-P (0-100) |
| <b>Bahr et al. (2006)</b>      | N=35 athletes (40 tendons) (31y) | 33m (6-100m)     | 1)Eccentric exercise (decline squat) n=20 tendons<br>2)Surgery n=20 tendons                                      | Exercise for 12 weeks min | 0, 12w, 26w, 52w | VAS (0-10) – during functional tests | VISA-P (0-100) |
| <b>Breda et al. (2021)</b>     | N=76 athletes (24y)              | >1y (median)     | 1) Progressive tendon-loading exercise n=38<br>2)Eccentric exercise n=38                                         | Exercise for 24 weeks     | 0, 12w, 24w      | -                                    | VISA-P (0-100) |

|                               |                                                           |                  |                                                                                                                                                                                                    |                                                                                                   |                                 |                                       |                |
|-------------------------------|-----------------------------------------------------------|------------------|----------------------------------------------------------------------------------------------------------------------------------------------------------------------------------------------------|---------------------------------------------------------------------------------------------------|---------------------------------|---------------------------------------|----------------|
| <b>Cannell et al (2001)</b>   | N=19 athletes (26y)                                       | 3.6m (1.6-6.1m)  | 1)Eccentric exercise (drop squat) n=10<br>2)Concentric exercise n=9                                                                                                                                | Exercise daily for 12 weeks                                                                       | 0, 6w, 12w                      | VAS (0-10) - unspecified              | -              |
| <b>Clarke et al. (2011)</b>   | N=60 tendons (46 patients) (36y) – unspecified population | 11.1m            | 1)Injection of collagen-producing cells derived from dermal fibroblasts and suspended in autologous plasma + eccentric exercise n=33<br>2)Injection of autologous plasma + eccentric exercise n=27 | Single-injection                                                                                  | 0, 6w, 3m, 6m                   | -                                     | VISA-P (0-100) |
| <b>De Vries et al. (2016)</b> | N=97 athletes (27y)                                       | 18m (?m-?m)      | 1)Patellar strap n=21<br>2)Sports taping n=18<br>3)Placebo taping n=16<br>4)No treatment n=14                                                                                                      | 1 week                                                                                            | 0, 1w                           | VAS (0-100) – during and after sports | -              |
| <b>Dragoo et al. (2014)</b>   | N=23 (35y) – unspecified population                       | Not stated       | 1)Dry needling + eccentric exercise n=13<br>2)PRP + eccentric exercise n=10                                                                                                                        | A single treatment with dry needling and PRP<br>Eccentric programme for the duration of the study | 0, 3w, 6w, 9w, 12w, ≥26w        | VAS (0-10) - unspecified              | VISA-P (0-100) |
| <b>Frohm et al. (2007)</b>    | N=20 athletes (27y)                                       | Not stated (>3m) | 1)Eccentric device (Bromsman) n=11                                                                                                                                                                 | Supervised eccentric exercise twice weekly for 12 weeks                                           | Weekly. Isokinetic tests 0, 12w | VAS (0-10) - unspecified              | VISA-P (0-100) |

|                              |                                       |               |                                                                                                                               |                                                                                             |                      |                                      |                |
|------------------------------|---------------------------------------|---------------|-------------------------------------------------------------------------------------------------------------------------------|---------------------------------------------------------------------------------------------|----------------------|--------------------------------------|----------------|
|                              |                                       |               | 2)Eccentric exercise (decline squat) n=9                                                                                      |                                                                                             |                      |                                      |                |
| <b>Hoksrud et al. (2006)</b> | N=33 athletes (42 tendons) (24.8y)    | 37m           | 1)Polidocanol injections n=17<br>2)Placebo injections n=16<br>(Groups crossed over at 12w)                                    | Single-injection<br>Further injection at 4w or 8w if persistent pain and neovascularization | 0, 4m, 8m, 12m       | -                                    | VISA-P (0-100) |
| <b>Holden et al. (2020)</b>  | N=21 athletes (26.5y)                 | 24m (10-84m)  | 1) Isometric exercise n=21<br>2) Dynamic (isotonic) exercise n=21<br>The same group performed both interventions (cross-over) | A single session of each intervention                                                       | 0, post-intervention | NRS (0-10) – during functional tests | -              |
| <b>Jonsson et al (2005)</b>  | N=19 tendons (15 athletes) (24.9y)    | 17.4m (8-72m) | 1)Eccentric exercise (decline squat) n=10 tendons<br>2)Concentric exercise n=9 tendons                                        | Exercise daily for 12 weeks                                                                 | 0, 12w               | VAS (0-100) – during sports          | VISA-P (0-100) |
| <b>Kaux et al. (2016)</b>    | N=20 (30.3y) – unspecified population | 17m           | 1)Single PRP injection + eccentric exercise n=10<br>2) Two PRP injections + eccentric exercise n=10                           | A single injection or two injections within a week                                          | 0, 6w, 3m, 12m       | VAS (0-10) - unspecified             | VISA-P (0-100) |
| <b>Kaux et al. (2019)</b>    | N=33 athletes (29.4y)                 | >3m           | 1)PRP injection + eccentric exercise n=18                                                                                     | A single injection of PRP, 2 injections of HA 7 days apart                                  | 0, 6w, 3m            | VAS (0-10) - unspecified             | VISA-P (0-100) |

|                                   |                                                                     |                |                                                                                                                                          |                                                                    |                      |                                      |                |
|-----------------------------------|---------------------------------------------------------------------|----------------|------------------------------------------------------------------------------------------------------------------------------------------|--------------------------------------------------------------------|----------------------|--------------------------------------|----------------|
|                                   |                                                                     |                | 2)HA injection + eccentric exercise<br>n=15                                                                                              |                                                                    |                      |                                      |                |
| <b>Kongsgaard et al. (2009)</b>   | N=37 athletes (32.4y)                                               | 18.3m (>3-36m) | 1)Corticosteroid injection n=12<br>2)Eccentric exercise n=12<br>3)Heavy slow resistance exercise n=13                                    | 2 injections over 4 weeks<br>Exercise for 12 weeks                 | 0, 12w, 24w          | VAS (0-100) – during sports          | VISA-P (0-100) |
| <b>Lee et al. (2017)</b>          | N=34 athletes (22.6y)                                               | 33.6m          | 1)f-ESWT + eccentric exercise n=17<br>2)Sham ESWT + eccentric exercise n=17                                                              | 6 sessions of ESWT over 6 weeks<br>Eccentric exercise for 12 weeks | 0, 12w               | VAS (0-10) – during activity         | VISA-P (0-100) |
| <b>Lopez-Royo et al. (2021)</b>   | N=50 athletes (32.5y)                                               | >3m            | 1) Dry needling + eccentric exercise n=16<br>2) Percutaneous needle electrolysis + eccentric exercise n=17<br>3) Eccentric exercise n=17 | 4 needling sessions over 8 weeks                                   | 0, 10w, 22w          | VAS (0-10) – over last 24 hours      | VISA-P (0-100) |
| <b>Pietrosimone et al. (2020)</b> | N=28 athletes (only N=13 used as remaining 15 asymptomatic) (19.6y) | >4m            | 1) Isometric exercise n=13<br>2)Sham transcutaneous electric nerve stimulator n=13                                                       | Single session                                                     | 0, post-intervention | VAS (0-10) – during functional tests | -              |

|                                 |                                             |                | Groups crossed-over                                                                                             |                                                                               |                                     |                                       |                |
|---------------------------------|---------------------------------------------|----------------|-----------------------------------------------------------------------------------------------------------------|-------------------------------------------------------------------------------|-------------------------------------|---------------------------------------|----------------|
| <b>Resteghini et al. (2016)</b> | N=22 athletes (38.9y)                       | 18m (5-36m)    | 1)Autologous Blood Injection + eccentric exercise n=11<br>2)Placebo injection + eccentric exercise n=11         | Single injection                                                              | 0, 1m, 3m, 12m                      | VAS (0-10) - unspecified              | VISA-P (0-100) |
| <b>Rigby et al. (2015)</b>      | N=31 (24.6y) – unspecified population       | >1m <2y        | 1)Wired iontophoresis n=11<br>2)Wireless iontophoresis n=10<br>3)Sham iontophoresis n=10                        | 2 weeks                                                                       | 0, 1w, 2w                           | NRS (0-100) – during functional tests | -              |
| <b>Rio et al. (2017)</b>        | N=29 athletes (23y)                         | 35.8m (1-120m) | 1)Isometric exercise n=13<br>2)Isotonic exercise n=16                                                           | 4 weeks                                                                       | 0, daily pre- and post-exercise, 4w | NRS (0-10) – during functional tests  | VISA-P (0-100) |
| <b>Rio et al. (2015)</b>        | N=6 athletes (27y)                          | Not stated     | 1)Isometric exercise n=6<br>2)Isotonic exercise n=6<br>The same group performed both interventions (cross-over) | A single session of each intervention                                         | 0, post-intervention                | NRS (0-10) – during functional tests  | -              |
| <b>Rodas et al. (2021)</b>      | N=20 (34y) – unspecified general population | 23.6m (>4m)    | 1) Bone marrow mesenchymal stem cells + exercise n=10                                                           | Group 1 received a sham saline injection at day 0 and bone marrow mesenchymal | 0, 6m                               | VAS (0-10) – during functional tests  | VISA-P (0-100) |

|                                                 |                       |              |                                                                                                                    |                                                                                           |                     |                                      |                |
|-------------------------------------------------|-----------------------|--------------|--------------------------------------------------------------------------------------------------------------------|-------------------------------------------------------------------------------------------|---------------------|--------------------------------------|----------------|
|                                                 |                       |              | 2) LP-PRP + exercise<br>n=10<br>The exercises included isotonic, followed by concentric and then eccentric loading | stem cells injection 23 days later<br>Group 2 received LP-PRP injections at days 0 and 23 |                     |                                      |                |
| <b>Scott et al. (2019)</b>                      | N=61 athletes (32y)   | 2.1y (>6m)   | 1)LR-PRP n=20<br>2)LP-PRP n=21<br>3)Saline n=20                                                                    | A single injection followed by 6 weeks of supervised exercise                             | 0, 6w, 12w, 6m, 12m | NRS (0-10) – during activity         | VISA-P (0-100) |
| <b>Stasinopoulos &amp; Stasinopoulos (2004)</b> | N=30 athletes (28y)   | Not stated   | 1)Eccentric exercise + stretching n=10<br>2)Pulsed ultrasound n=10<br>3)Transverse friction                        | 4 weeks                                                                                   | 0, 4w, 8w, 16w      | Non-numerical scale                  | -              |
| <b>Steunebrink et al. (2013)</b>                | N=33 athletes (32.9y) | 48w          | 1)Topical GTN + eccentric exercise n=16<br>2)Topical Placebo + eccentric exercise n=17                             | One patch daily for 12 weeks<br>Eccentric exercise for 12 weeks                           | 0, 6w, 12w, 24w     | VAS (0-10) – during sports           | VISA-P (0-100) |
| <b>Taunton et al. (2003)</b>                    | N=20 athletes (?y)    | Not stated   | 1)ESWT n=10<br>2)Placebo ESWT n=10                                                                                 | 3 to 5 sessions over 7 weeks                                                              | 0, 5w, 12w          | -                                    | VISA-P (0-100) |
| <b>Thijs et al. (2017)</b>                      | N=52 athletes (27.3y) | 23m (3-120m) | 1)f-ESWT + eccentric exercise n=22<br>2)Sham ESWT + eccentric exercise n=30                                        | Exercise (decline squat) for 12 weeks<br>ESWT 3 sessions over 2 weeks                     | 0, 6w, 12w, 24w     | NRS (0-10) – during functional tests | VISA-P (0-100) |

|                                   |                                     |                |                                                                                          |                                                                              |                                                |                                                          |                |
|-----------------------------------|-------------------------------------|----------------|------------------------------------------------------------------------------------------|------------------------------------------------------------------------------|------------------------------------------------|----------------------------------------------------------|----------------|
|                                   |                                     |                | Eccentric exercise (decline squat) twice daily for 12 weeks                              |                                                                              |                                                |                                                          |                |
| <b>Van Ark et al. (2016)</b>      | N=29 athletes (23y)                 | 35.8m (1-120m) | 1)Isometric exercise n=13<br>2)Isotonic exercise n=16                                    | 4 weeks                                                                      | 0, 4w                                          | NRS (0-10) – during functional tests                     | VISA-P (0-100) |
| <b>Van der Worp et al. (2014)</b> | N=43 athletes (31.1y)               | 35.5m (>3m)    | 1) f-ESWT + eccentric exercise n=21<br>2) r-ESWT + eccentric exercise n=22               | 3 sessions over 2 weeks                                                      | 0, 7w, 14w                                     | VAS (0-10) – during activities, sports and decline squat | VISA-P (0-100) |
| <b>Vetrano et al. (2013)</b>      | N=46 athletes (26.9y)               | 18.2m (>3m)    | 1)LR-PRP n=23<br>2)f-ESWT n=23<br>Both groups received a home exercise programme         | PRP 2 injections over 2 weeks<br>ESWT 3 sessions over 1 week                 | 0, 2m, 6m, 12m                                 | VAS (0-10) – during functional tests                     | VISA-P (0-100) |
| <b>Visnes et al (2005)</b>        | N=29 athletes (26.6y)               | 73.6m          | 1)Eccentric exercise (decline squat) n=13<br>2)Standard training n=16                    | Exercise twice daily for 12 weeks                                            | 0, 1-12w, 18w, 40w                             | VAS (0-10) – during exercise                             | VISA-P (0-100) |
| <b>Wang et al. (2007)</b>         | N=50 athletes (54 tendons) (29.8y)  | 13.8m (6-64m)  | 1)ESWT n=27<br>2)“Conservative treatments” (NSAIDs, exercise, strap, physiotherapy) n=23 | A single session of ESWT<br>Duration of “conservative treatments” not stated | 0, 1m, 3m, 6m, 12m, then once a year up to 53m | VAS (0-10) – on palpation and walking up and down stairs | VISA (0-100)   |
| <b>Warden et al. (2008)</b>       | N=37 (27y) – unspecified population | 3.8y (>6m)     | 1)US + eccentric exercise n=17                                                           | US and exercise for 12 weeks                                                 | 0, 12w                                         | VAS (0-10) – during activity                             | VISA-P (0-100) |

|                               |                                  |             |                                                                                   |                                                                                   |                      |                                                             |                |
|-------------------------------|----------------------------------|-------------|-----------------------------------------------------------------------------------|-----------------------------------------------------------------------------------|----------------------|-------------------------------------------------------------|----------------|
|                               |                                  |             | 2)Sham US + eccentric exercise<br>n=20                                            |                                                                                   |                      |                                                             |                |
| <b>Willberg et al. (2011)</b> | N=52 tendons (45 athletes) (26y) | 22m (6-60m) | 1)Sclerosing polidocanol injections n=26<br>2)Arthroscopic surgery n=26           | Polidocanol maximum 3 injections 6 weeks apart<br>A single treatment with surgery | 0, 2w, 6-8w, 6m, 12m | VAS (0-10) – during sports and at rest                      | -              |
| <b>Young et al. (2005)</b>    | N=17 athletes (27.3y)            | Not stated  | 1)Eccentric exercise (decline squat) n=9<br>2)Eccentric exercise (step squat) n=8 | 12 weeks                                                                          | 0, 12w, 12m          | VAS (0-10) – during activity                                | VISA-P (0-100) |
| <b>Zwerver et al. (2011)</b>  | N=62 athletes (25y)              | 7.7m        | 1)f-ESWT n=31<br>2) Sham ESWT n=31                                                | ESWT 3 sessions over 2 weeks                                                      | 0, 1w, 12w, 22w      | VAS (0-10) - during activities, sports and functional tests | VISA-P (0-100) |

**Suppl. Table 1. Characteristics of the included randomised controlled trials (participants, interventions, comparators and outcome measures).** ESWT, extracorporeal shockwave therapy; f-ESWT, focal ESWT; GTN, glyceryl trinitrate; m, months; HA, hyaluronic acid; LP-PRP, leucocyte-poor PRP; LR-PRP, leucocyte-rich PRP; NRS, numerical rating scale; NSAIDs, non-steroidal anti-inflammatory drugs; PRP, platelet-rich plasma; r-ESWT, radial ESWT; US, ultrasound; VAS, visual analogue scale; VISA-P, Victorian Institute of Sports Assessment – Patellar; w, weeks; y, years.



| Study (year)                   | Internal Validity<br>(Cochrane's Collaboration Tool for Assessing Risk of Bias) |                        |                                |                              |                              |                     |                                               | Overall risk | Justification                                                                                                           |
|--------------------------------|---------------------------------------------------------------------------------|------------------------|--------------------------------|------------------------------|------------------------------|---------------------|-----------------------------------------------|--------------|-------------------------------------------------------------------------------------------------------------------------|
|                                | Selection bias                                                                  |                        | Performance bias               | Detection bias               | Attrition bias               | Reporting bias      | Other                                         |              |                                                                                                                         |
|                                | Random sequence generation                                                      | Allocation concealment | Blinding of patients and staff | Blinding of outcome measures | Completeness of outcome data | Selective reporting |                                               |              |                                                                                                                         |
| <b>Abas et al. (2016)</b>      | Low                                                                             | ?                      | High                           | ?                            | Low                          | High                | High (no power calculation)                   | <b>High</b>  | <b>Single-blinded, inappropriate reporting of results, concealment process and blinding of assessment not described</b> |
| <b>Agergaard et al. (2021)</b> | Low                                                                             | Low                    | High                           | Low                          | Low                          | Low                 | Low                                           | <b>Low</b>   | -                                                                                                                       |
| <b>Bahr et al. (2006)</b>      | Low                                                                             | Low                    | High                           | High                         | Low                          | Low                 | Low                                           | <b>High</b>  | <b>Non-blinded</b>                                                                                                      |
| <b>Breda et al. (2021)</b>     | Low                                                                             | Low                    | High                           | Low                          | Low                          | Low                 | Low                                           | <b>Low</b>   | -                                                                                                                       |
| <b>Cannell et al (2001)</b>    | Low                                                                             | Low                    | High                           | Low                          | Low                          | Low                 | High (no power calculation, small population) | <b>High</b>  | <b>Single-blinded, small population</b>                                                                                 |
| <b>Clarke et al. (2011)</b>    | Low                                                                             | ?                      | Low                            | Low                          | Low                          | Low                 | Low                                           | <b>Low</b>   | -                                                                                                                       |
| <b>De Vries et al. (2016)</b>  | High                                                                            | ?                      | High                           | ?                            | High                         | Low                 | Low                                           | <b>High</b>  | <b>Inappropriate randomisation. Single-blinded, significant loss to follow up (29%)</b>                                 |
| <b>Dragoo et al. (2014)</b>    | Low                                                                             | Low                    | Low                            | Low                          | Low                          | Low                 | High (baseline age difference)                | <b>Low</b>   | -                                                                                                                       |
| <b>Frohm et al (2007)</b>      | ?                                                                               | ?                      | High                           | ?                            | Low                          | Low                 | High (no power calculation, small population) | <b>High</b>  | <b>Single-blinded, small population, randomisation/concealment process and blinding of assessment not described</b>     |
| <b>Hoksrud et al. (2006)</b>   | Low                                                                             | Low                    | Low                            | Low                          | Low                          | Low                 | Low                                           | <b>Low</b>   | <b>(Only "treatment period 1" of study included in systematic review)</b>                                               |
| <b>Holden et al. (2020)</b>    | Low                                                                             | Low                    | Low                            | High                         | Low                          | Low                 | Low                                           | <b>Low</b>   | -                                                                                                                       |

|                                   |     |     |      |      |      |     |                                                                                                                     |             |                                                                                                                                                                                                                              |
|-----------------------------------|-----|-----|------|------|------|-----|---------------------------------------------------------------------------------------------------------------------|-------------|------------------------------------------------------------------------------------------------------------------------------------------------------------------------------------------------------------------------------|
| <b>Jonsson et al (2005)</b>       | ?   | ?   | High | ?    | High | Low | High (population not enough for power)                                                                              | <b>High</b> | <b>Single-blinded, small population, randomisation/concealment process and blinding of assessment not described, significant loss to follow up (21%)</b>                                                                     |
| <b>Kaux et al. (2016)</b>         | ?   | ?   | ?    | ?    | ?    | Low | High (no power calculation, small population, baseline difference in pain)                                          | <b>High</b> | <b>Small population, baseline differences between groups (may reflect inappropriate randomisation), no details available for selection, performance, detection and attrition bias</b>                                        |
| <b>Kaux et al. (2019)</b>         | ?   | ?   | High | High | ?    | Low | High (baseline difference in pain)                                                                                  | <b>High</b> | <b>Non-blinded, baseline differences between groups (may reflect inappropriate randomisation), randomisation/concealment process not described</b>                                                                           |
| <b>Kongsgaard et al. (2009)</b>   | Low | ?   | High | Low  | Low  | Low | Low                                                                                                                 | <b>Low</b>  | -                                                                                                                                                                                                                            |
| <b>Lopez-Royo et al. (2021)</b>   | Low | Low | Low  | Low  | Low  | Low | Low                                                                                                                 | <b>Low</b>  | -                                                                                                                                                                                                                            |
| <b>Lee et al. (2017)</b>          | ?   | ?   | High | ?    | Low  | Low | Low                                                                                                                 | <b>High</b> | <b>Single-blinded, randomisation/concealment process and blinding of assessment not described</b>                                                                                                                            |
| <b>Pietrosimone et al. (2020)</b> | Low | Low | High | Low  | Low  | Low | Low                                                                                                                 | <b>Low</b>  | -                                                                                                                                                                                                                            |
| <b>Resteghini et al. (2016)</b>   | Low | Low | Low  | Low  | ?    | Low | Low                                                                                                                 | <b>Low</b>  | -                                                                                                                                                                                                                            |
| <b>Rigby et al. (2015)</b>        | Low | Low | ?    | High | ?    | Low | High (baseline difference in pain, small population, no power calculation, acute and chronic tendinopathy patients) | <b>High</b> | <b>Single-blinded, baseline difference between groups (may reflect inappropriate randomisation), no details about completeness of outcome data, no power calculation, mixture of acute and chronic tendinopathy patients</b> |

|                                                 |      |     |      |      |      |      |                                                                      |             |                                                                                                                                                                          |
|-------------------------------------------------|------|-----|------|------|------|------|----------------------------------------------------------------------|-------------|--------------------------------------------------------------------------------------------------------------------------------------------------------------------------|
| <b>Rio et al. (2017)</b>                        | Low  | Low | High | High | High | Low  | High (no exclusion criteria)                                         | <b>High</b> | <b>Non-blinded, significant loss to follow up (38%), no exclusion criteria</b>                                                                                           |
| <b>Rio et al. (2015)</b>                        | Low  | Low | High | ?    | Low  | Low  | High (acute and chronic tendinopathy patients)                       | <b>High</b> | <b>Single-blinded, no description of blinding of assessment, mixture of acute and chronic tendinopathy patients</b>                                                      |
| <b>Rodas et al. (2021)</b>                      | Low  | ?   | High | Low  | Low  | Low  | High (small population)                                              | <b>High</b> | <b>Small population, concealment process not described</b>                                                                                                               |
| <b>Scott et al. (2019)</b>                      | High | Low | Low  | High | Low  | High | Low                                                                  | <b>High</b> | <b>Single-blinded, inappropriate randomisation, inadequate reporting of results (no p values)</b>                                                                        |
| <b>Stasinopoulos &amp; Stasinopoulos (2004)</b> | Low  | ?   | High | Low  | Low  | High | High (no power calculation, small population, no baseline pain data) | <b>High</b> | <b>Single-blinded, small population, no baseline pain data, non-clinically relevant outcome measures (categorical pain scale)</b>                                        |
| <b>Steunebrink et al. (2013)</b>                | Low  | Low | ?    | ?    | Low  | Low  | High (baseline difference in pain)                                   | <b>High</b> | <b>Baseline difference between groups (may reflect inappropriate randomisation), blinding processes not described</b>                                                    |
| <b>Taunton et al. (2003)</b>                    | ?    | Low | High | Low  | Low  | Low  | High (no power calculation, only mean values reported for results)   | <b>High</b> | <b>Patients not blinded any more at 12 week follow up, randomisation process not described, small sample with no power calculation, inadequate reporting of results)</b> |
| <b>Thijs et al. (2017)</b>                      | Low  | Low | Low  | Low  | Low  | Low  | Low                                                                  | <b>Low</b>  | -                                                                                                                                                                        |
| <b>Van Ark et al. (2016)</b>                    | Low  | Low | High | High | High | Low  | High (acute and chronic tendinopathy patients)                       | <b>High</b> | <b>Non-blinded, significant loss to follow up (38%), no exclusion criteria</b>                                                                                           |
| <b>Van der Worp et al. (2014)</b>               | Low  | Low | Low  | Low  | Low  | Low  | High (population not enough for power)                               | <b>Low</b>  | -                                                                                                                                                                        |
| <b>Vetrano et al. (2013)</b>                    | Low  | ?   | High | Low  | Low  | Low  | ? (no power calculation but large population)                        | <b>Low</b>  | -                                                                                                                                                                        |

|                               |      |     |      |      |      |      |                                                  |             |                                                                                                                                                      |
|-------------------------------|------|-----|------|------|------|------|--------------------------------------------------|-------------|------------------------------------------------------------------------------------------------------------------------------------------------------|
| <b>Visnes et al (2005)</b>    | High | ?   | High | ?    | Low  | Low  | High (no power calculation, small population)    | <b>High</b> | <b>Inappropriate randomisation/concealment, single-blinded, blinding of assessment not described, small population</b>                               |
| <b>Wang et al. (2007)</b>     | High | ?   | High | ?    | Low  | High | Low                                              | <b>High</b> | <b>Single-blinded, inappropriate randomisation, inappropriate reporting of results, concealment process and blinding of assessment not described</b> |
| <b>Warden et al. (2008)</b>   | Low  | Low | Low  | Low  | High | Low  | High (no power calculation, small sample)        | <b>Low</b>  | -                                                                                                                                                    |
| <b>Willberg et al. (2011)</b> | Low  | Low | High | High | Low  | Low  | Low                                              | <b>High</b> | <b>Non-blinded</b>                                                                                                                                   |
| <b>Young et al. (2005)</b>    | Low  | Low | High | Low  | Low  | Low  | High (no power calculation, small population)    | <b>High</b> | <b>Single-blinded, small population</b>                                                                                                              |
| <b>Zwerver et al. (2011)</b>  | Low  | Low | Low  | Low  | Low  | Low  | High (population not enough for power but large) | <b>Low</b>  | -                                                                                                                                                    |

**Suppl. Table 2. Risk of bias assessment for the included studies with justification where studies deemed as high overall risk of bias.**

| Comparison                                                                                                           | Study                             | Pain (VAS 0-10)                   |    |    | MD VAS (95% CI)                                                 |                  |    | Function (VISA-P 0-100) |    |    | MD VISA-P (95% CI)                                    |                     |    |
|----------------------------------------------------------------------------------------------------------------------|-----------------------------------|-----------------------------------|----|----|-----------------------------------------------------------------|------------------|----|-------------------------|----|----|-------------------------------------------------------|---------------------|----|
|                                                                                                                      | Follow up                         | ST                                | MT | LT | ST                                                              | MT               | LT | ST                      | MT | LT | ST                                                    | MT                  | LT |
| <b>Eccentric (1) vs Concentric (2) exercise</b>                                                                      | Cannell et al (2001)              | ↔                                 | -  | -  | -1.2<br>(-2.4, 0)                                               | -                | -  | -                       | -  | -  | -                                                     | -                   | -  |
|                                                                                                                      | Jonsson et al (2005)              | ↓                                 | -  | -  | -4.4<br>(-5.6, -3.2)                                            | -                | -  | ↑                       | -  | -  | +44.6<br>(35, 54.2)                                   | -                   | -  |
| <b>Overall Eccentric (1) vs Concentric (2) exercise (Certainty of Evidence)</b>                                      |                                   | ↔<br>(low)                        | -  | -  | <b>-2.8</b><br><b>(-5.9, 0.3)<sup>^</sup></b><br>(low)          | -                | -  | -                       | -  | -  | -                                                     | -                   | -  |
| <b>f-ESWT + Eccentric exercise (1) vs sham ESWT + Eccentric exercise (2)</b>                                         | Lee et al. (2017)                 | ↔                                 | -  | -  | +0.6<br>(-0.8, 2.1)                                             | -                | -  | ↔                       | -  | -  | -2.1<br>(-7.8, 3.6)                                   | -                   | -  |
|                                                                                                                      | <u>Thijs et al. (2017)</u>        | ↔                                 | ↔  | -  | -0.3<br>(-1.6, 1)                                               | +0.3 (-0.6, 1.2) | -  | ↔                       | ↔  | -  | -1.5<br>(-8.3, 4.3)                                   | -2.9<br>(-9.1, 3.3) | -  |
| <b>Overall f-ESWT + Eccentric exercise (1) vs sham ESWT + Eccentric exercise (2) (Certainty of Evidence)</b>         |                                   | ↔<br>(moderate) <sup>^</sup><br>^ | -  | -  | <b>+0.1</b><br><b>(-0.8, 1)</b><br>(moderate) <sup>^</sup><br>^ | -                | -  | ↔<br>(moderate)<br>^^   | -  | -  | <b>-1.8 (-8, 4.4)</b><br>(moderate) <sup>^</sup><br>^ | -                   | -  |
| <b>Isometric (1) vs Isotonic (2) exercise – immediate post-intervention outcomes</b>                                 | <u>Holden et al. (2020)</u>       | ↔*                                | -  | -  | +0.3<br>(1.3, -0.7)                                             | -                | -  | -                       | -  | -  | -                                                     | -                   | -  |
|                                                                                                                      | Rio et al. (2015)                 | ↓*                                | -  | -  | -4.3<br>(-7.4, -1.2)                                            | -                | -  | -                       | -  | -  | -                                                     | -                   | -  |
|                                                                                                                      | Rio et al. (2017)                 | ↓*                                | -  | -  | -0.9<br>(-1.1, -0.7)                                            | -                | -  | ↔                       | -  | -  | N/A                                                   | -                   | -  |
| <b>Overall Isometric (1) vs Isotonic (2) exercise – immediate post-intervention outcomes (Certainty of Evidence)</b> |                                   | ↔<br>(low) <sup>^</sup><br>^^     | -  | -  | <b>-1</b><br><b>(-2.6, 0.5)</b><br>(low) <sup>^^</sup>          | -                | -  | -                       | -  | -  | -                                                     | -                   | -  |
| <b><u>Isometric exercise (1) vs sham TENS (2) –</u></b>                                                              | <u>Pietrosimone et al. (2020)</u> | ↔                                 | -  | -  | -0.1 [-1.1, 0.9]                                                | -                | -  | -                       | -  | -  | -                                                     | -                   | -  |

|                                                                             |                         |    |    |    |                  |                   |                  |   |    |    |                    |                   |                    |
|-----------------------------------------------------------------------------|-------------------------|----|----|----|------------------|-------------------|------------------|---|----|----|--------------------|-------------------|--------------------|
| <b>immediate post-intervention outcomes</b>                                 |                         |    |    |    |                  |                   |                  |   |    |    |                    |                   |                    |
| <b>Isometric (1) vs Isotonic (2) exercise – 4-week outcomes</b>             | Van Ark et al. (2016)   | ↔  | -  | -  | -0.5 (-2.6, 1.6) | -                 | -                | ↔ | -  | -  | -1 (-11.1, 9.1)    | -                 | -                  |
| <b>Moderate, slow resistance (1) vs heavy, slow resistance (2) exercise</b> | Agergaard et al. (2021) | ↔  | -  | ↔  | -0.6 (-1.3, 0.1) | -                 | -0.5 (-1, 0)     | ↔ | -  | ↔  | +0.9 (-12.8, 14.6) | -                 | +1.8 (-11.8, 15.4) |
| <b>Eccentric exercise decline squat (1) vs standard/step squat (2)</b>      | Young et al. (2005)     | ↑  | -  | ↔  | +1.4 (-1.3, 3.5) | -                 | +0.2 (-0.7, 1.1) | ↔ | -  | ↑  | +7 (-1.6, 15.6)    | -                 | +9 (0.4, 17.6)     |
| <b>Progressive tendon-loading exercise (1) vs eccentric exercise (2)</b>    | Breda et al. (2021)     | -  | -  | -  | -                | -                 | -                | ↔ | ↑  | -  | +1.4 (-5.5, 8.3)   | +8.7 (1.2, 16.2)  | -                  |
| <b>Eccentric exercise (1) vs Surgery (2)</b>                                | Bahr et al. (2006)      | -  | -  | ↔  | -                | -                 | +0.8 (-0.1, 1.7) | ↔ | ↔  | -  | +9 (0.9, 17.1)     | 0 (-8.6, 8.6)     | -                  |
| <b>LR-PRP injection + exercise (1) vs Saline injection + exercise (2)</b>   | Scott et al. (2019)     | ↔  | ↔  | ↔* | +1.1 (-0.7, 2.9) | +0.8 (-0.9, 2.5)  | +2.6 (0.8, 4.4)  | ↔ | ↔* | ↔* | -6 (-20.9, 8.9)    | -17 (-32.3, -1.7) | -22 (-38.7, -5.3)  |
| <b>LP-PRP injection + exercise (1) vs Saline injection + exercise (2)</b>   | Scott et al. (2019)     | ↔  | ↔* | ↔  | -1.1 (-3, 0.8)   | -1.9 (-3.7, -1.1) | -0.5 (-2.3, 1.3) | ↔ | ↔  | ↔  | +2 (-13.8, 17.8)   | +1 (-14.3, 16.3)  | -5 (-20.8, 10.8)   |
| <b>LR-PRP injection + exercise (1) vs LP-PRP injection + exercise (2)</b>   | Scott et al. (2019)     | ↔* | ↔* | ↔* | +2.2 (0.4, 4)    | +2.7 (1, 4.4)     | +3.1 (1.2, 5)    | ↔ | ↔* | ↔* | -8 (-24.7, 8.7)    | -17 (-33.7, -0.3) | -17 (-35.4, 1.4)   |

|                                                                                       |                                 |   |   |   |                  |                  |   |   |   |   |                      |                    |   |
|---------------------------------------------------------------------------------------|---------------------------------|---|---|---|------------------|------------------|---|---|---|---|----------------------|--------------------|---|
| <b>BM-MSK + exercise vs LP-PRP injection + exercise (2)</b>                           | Rodas et al. (2021)             | - | ↔ | - | -                | +1.3 (-0.7, 3.3) | - | - | ↔ | - | -                    | -2.2 (-23.9, 19.5) | - |
| <b>Patellar strap (1) vs Sports taping (2)</b>                                        | De Vries et al. (2016)          | ↔ | - | - | +0.2 (-0.8, 1.2) | -                | - | - | - | - | -                    | -                  | - |
| <b>Patellar strap (1) vs no treatment (2)</b>                                         | De Vries et al. (2016)          | ↔ | - | - | -0.3 (-1.3, 0.7) | -                | - | - | - | - | -                    | -                  | - |
| <b>Sports taping (1) vs no treatment (2)</b>                                          | De Vries et al. (2016)          | ↔ | - | - | -0.5 (-1.5, 0.5) | -                | - | - | - | - | -                    | -                  | - |
| <b>Electrophysiotherapy + eccentric exercise (1) vs USGT + eccentric exercise (2)</b> | Abat et al. (2016)              | - | - | - | -                | -                | - | ↓ | - | - | -12.5 (-21.4, -3.6)  | -                  | - |
| <b>Dry Needling + Eccentric exercise (1) vs PRP + Eccentric exercise (2)</b>          | <u>Dragoo et al. (2014)</u>     | ↔ | ↔ | - | +1.5 (0, 3)      | +1.1 (-0.1, 2.3) | - | ↓ | ↔ | - | -20.2 (-31.3, -10.1) | +3.3 (-8.2, 14.4)  | - |
| <b>Dry Needling + Eccentric exercise (1) vs PNE + Eccentric exercise (2)</b>          | <u>Lopez-Royo et al. (2021)</u> | ↔ | ↔ | - | +0.4 (-0.6, 1.4) | -0.4 (-1.3, 0.5) | - | ↔ | ↔ | - | -0.1 (-6.7, 6.5)     | -3.4 (-12.5, 5.7)  | - |
| <b>Dry Needling + Eccentric exercise (1) vs Eccentric exercise (2)</b>                | <u>Lopez-Royo et al. (2021)</u> | ↔ | ↔ | - | +0.7 (-0.4, 1.8) | -0.5 (-1.5, 0.5) | - | ↔ | ↔ | - | -4.3 (-12, 3.4)      | -3.2 (-11.4, 5)    | - |
| <b>PNE + Eccentric exercise (1) vs Eccentric exercise (2)</b>                         | <u>Lopez-Royo et al. (2021)</u> | ↔ | ↔ | - | +0.3 (-0.7, 1.3) | -0.1 (-1.2, 1)   | - | ↔ | ↔ | - | -3.6 (-11.3, 4.1)    | +0.8 (-7.3, 8.9)   | - |
| <b>PRP injection + eccentric exercise (1)</b>                                         | Kaux et al. (2019)              | ↔ | - | - | -0.9 (-1.9, 0.1) | -                | - | ↔ | - | - | -8 (-17.8, 1.8)      | -                  | - |

|                                                                                                                                 |                                 |    |   |    |                   |                |                   |    |   |   |                  |                    |                |  |
|---------------------------------------------------------------------------------------------------------------------------------|---------------------------------|----|---|----|-------------------|----------------|-------------------|----|---|---|------------------|--------------------|----------------|--|
| <b>vs HA injections + eccentric exercise (2)</b>                                                                                |                                 |    |   |    |                   |                |                   |    |   |   |                  |                    |                |  |
| <b><u>Polidocanol injections (1) vs placebo injections (2)</u></b>                                                              | <u>Hoksrud et al. (2006)</u>    | -  | - | -  | -                 | -              | -                 | -  | ↑ | - | -                | +10 (0.1, 19.9)    | -              |  |
| <b><u>Injection of collagen-producing cells + eccentric exercise vs Injection of autologous plasma + eccentric exercise</u></b> | <u>Clarke et al. (2011)</u>     | -  | - | -  | -                 | -              | -                 | ↑  | ↑ | - | +11 (5.1, 16.9)  | +8.1 (2.4, 13.7)   | -              |  |
| <b><u>Eccentric exercise (1) vs Eccentric device (overload) (2)</u></b>                                                         | Frohm et al (2007)              | ↔  | - | -  | 0 (-0.6, 0.6)     | -              | -                 | ↔  | - | - | -2 (-15.6, 11.4) | -                  | -              |  |
| <b><u>Single PRP injection + Eccentric exercise (1) vs two PRP injections + Eccentric exercise (2)</u></b>                      | Kaux et al. (2016)              | ↔* | - | ↔* | -2 (1.2, 2.8)     | -              | -3.4 (-4.1, -2.7) | ↔  | - | ↔ | +11 (2.3, 19.7)  | -                  | -1 (-9.1, 7.1) |  |
| <b><u>Corticosteroid injection (1) vs Eccentric exercise (2)</u></b>                                                            | <u>Kongsgaard et al. (2009)</u> | ** | ↔ | -  | -1.2 (0, 2.4)     | 0 (-1.2, 1.2)  | -                 | ** | ↓ | - | -4 (-10.9, 2.9)  | -23 (-32.4, -13.8) | -              |  |
| <b><u>Corticosteroid injection (1) vs Heavy Slow Resistance exercise (2)</u></b>                                                | <u>Kongsgaard et al. (2009)</u> | ** | ↑ | -  | +0.2              | +2.1           | -                 | ** | ↓ | - | -4 (-13.1, 5.1)  | -30 (-38.9, -21.1) | -              |  |
| <b><u>Heavy Slow Resistance (1) vs Eccentric (2) exercise</u></b>                                                               | <u>Kongsgaard et al. (2009)</u> | ** | ↔ | -  | -1.4 (-2.5, -0.3) | -1.1 (-2.2, 0) | -                 | ** | ↔ | - | 0 (-6.5, 6.5)    | -7 (-14.6, 0.4)    | -              |  |



|                                                                                  |                                          |   |   |   |                   |              |                  |   |   |   |                   |                  |                    |
|----------------------------------------------------------------------------------|------------------------------------------|---|---|---|-------------------|--------------|------------------|---|---|---|-------------------|------------------|--------------------|
| <b><u>Autologous blood + eccentric (1) vs Saline + eccentric (2)</u></b>         | <b><u>Resteghini et al. (2016)</u></b>   | ↔ | - | ↔ | +0.3 (-1.9, 2.5)  | -            | +0.6 (-1.6, 2.8) | ↔ | - | ↔ | +4.2 (-10, 18.4)  | -                | -0.6 (-14.8, 13.6) |
| <b>Wired (1) vs Wireless (2) iontophoresis</b>                                   | Rigby et al. (2015)                      | ↔ | - | - | -0.5 (-2.1, 1.1)  | -            | -                | - | - | - | -                 | -                | -                  |
| <b>Wired (1) vs Sham (2) iontophoresis</b>                                       | Rigby et al. (2015)                      | ↔ | - | - | -1.1 (-3.1, 1.1)  | -            | -                | - | - | - | -                 | -                | -                  |
| <b>Wireless (1) vs Sham (2) iontophoresis</b>                                    | Rigby et al. (2015)                      | ↔ | - | - | -1.6 (-3.4, 0.2)  | -            | -                | - | - | - | -                 | -                | -                  |
| <b>Eccentric exercise + stretching (1) vs pulsed US (2)</b>                      | Stasinopoulos & Stasinopoulos (2004)     | ↓ | - | - | -                 | -            | -                | - | - | - | -                 | -                | -                  |
| <b>Eccentric exercise + stretching (1) vs transverse friction (2)</b>            | Stasinopoulos & Stasinopoulos (2004)     | ↓ | - | - | -                 | -            | -                | - | - | - | -                 | -                | -                  |
| <b>Pulsed US (1) vs transverse friction (2)</b>                                  | Stasinopoulos & Stasinopoulos (2004)     | ↔ | - | - | -                 | -            | -                | - | - | - | -                 | -                | -                  |
| <b>Topical GTN + Eccentric exercise (1) vs Placebo + Eccentric exercise (2)</b>  | Steunebrink et al. (2013)                | - | ↔ | - | -1.7 (-3.1, -0.3) | -0.5 (-2, 1) | -                | - | ↔ | - | +4.1 (-3.7, 11.9) | -0.9 (-8.9, 7.1) | -                  |
| <b><u>f-ESWT + Eccentric exercise (1) vs r-ESWT + Eccentric exercise (2)</u></b> | <b><u>Van der Worp et al. (2014)</u></b> | ↔ | - | - | +0.1 (-1, 1.2)    | -            | -                | ↔ | - | - | +6.3 (-1.6, 14.2) | -                | -                  |

|                                                                                 |                                     |   |   |   |                     |                     |                    |   |   |   |                      |                     |                       |
|---------------------------------------------------------------------------------|-------------------------------------|---|---|---|---------------------|---------------------|--------------------|---|---|---|----------------------|---------------------|-----------------------|
| <b><u>LR-PRP (1) vs ESWT (2)</u></b>                                            | <b><u>Vetrano et al. (2013)</u></b> | ↔ | ↓ | ↓ | -1<br>(-1.8, -0.2)  | -1.8<br>(-2.6, -1)  | -2<br>(-2.8, -1.2) | ↔ | ↑ | ↑ | +5.7<br>(-1.2, 12.6) | +13.8<br>(-7.2, 20) | +14.5<br>(8, 21)      |
| <b><u>Eccentric exercise (1) vs Standard training (2)</u></b>                   | Visnes et al (2005)                 | - | - | - | -                   | -                   | -                  | ↔ | - | - | -1<br>(-9.2, 7.2)    | -                   | -                     |
| <b><u>ESWT (1) vs “Conservative treatments” (2)</u></b>                         | Wang et al. (2007)                  | - | - | ↓ | -                   | -                   | -4.7 (-5.7, -3.7)  | - | - | ↑ | -                    | -                   | +47.7<br>(39.8, 55.6) |
| <b><u>US + Eccentric exercise (1) vs Sham US + Eccentric Exercise (2)</u></b>   | <b><u>Warden et al. (2008)</u></b>  | ↔ | - | - | +0.3<br>(-0.8, 1.4) | -                   | -                  | ↔ | - | - | -1.1<br>(-8.7, 6.5)  | -                   | -                     |
| <b><u>Sclerosing polidocanol injections (1) vs Arthroscopic surgery (2)</u></b> | Willberg et al. (2011)              | - | - | ↑ | -                   | -                   | -                  | - | - | - | -                    | -                   | -                     |
| <b><u>f-ESWT (1) vs Sham ESWT (2)</u></b>                                       | <b><u>Zwerver et al. (2011)</u></b> | ↔ | ↔ | - | -0.2<br>(-1.2, 0.8) | -0.4<br>(-1.4, 0.6) | -                  | ↔ | ↔ | - | +0.8<br>(-4.7, 6.3)  | +0.8<br>(-4.7, 6.3) | -                     |
|                                                                                 | Taunton et al. (2003)               | - | - | - | -                   | -                   | -                  | ↑ | - | - | +3.7 (CI n/a)        | -                   | -                     |

**Suppl. Table 3. Results of compared interventions from included studies shown a) qualitatively based on the direction of effect [“Pain (VAS 0-10)” and “Function (VISA-P 0-100)”] and b) quantitatively [“MD VAS (95% CI)” and “MD VISA-P (95% CI)”].** Where mean differences (MD) are reported, for pain VAS the minus (-) sign favours intervention “1” and the plus (+) sign intervention “2”; for VISA-P, the plus (+) sign favours intervention “1” and the minus (-) sign intervention “2”. Where the direction of effect is reported, for pain VAS, the “down” arrow (↓) favours intervention “1” at statistical significance, the “up” arrow (↑) intervention “2” and the “equal” arrow (↔) shows no statistical difference for the compared interventions; for VISA-P, the “up” arrow (↑) favours intervention “1” and the “down” (↓) arrow intervention “2”. Underlined comparisons and studies are those of low risk of bias.

*BM-MSC, bone marrow mesenchymal stem cells; ESWT, extracorporeal shockwave therapy; f-ESWT, focal ESWT; GTN, glyceryl trinitrate; m, months; LP-PRP, leucocyte-poor PRP; LR-PRP, leucocyte-rich PRP; NRS, numerical rating scale; NSAIDs, non-steroidal anti-inflammatory drugs; PNE, percutaneous needle electrolysis; PRP, platelet-rich plasma; r-ESWT, radial ESWT; TENS, transcutaneous electric nerve stimulation; US, ultrasound; USGT, ultrasound-guided galvanic therapy; VAS, visual analogue scale; VISA-P, Victorian Institute of Sports Assessment – Patellar; w, weeks; y, years*

^Meta-analysis abandoned due to substantial heterogeneity ( $I^2=83\%$ )

^^ Strength of evidence downgraded for high overall risk of bias

^^^ Strength of evidence downgraded for high overall risk of bias and indirectness of evidence

\*Differences appear significant both clinically and statistically. However, the authors state that there were no statistically significant differences

\*\*No inter-group statistical tests at 12 weeks

N/A, not available

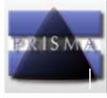**Figure 1. PRISMA 2009 Flow Diagram**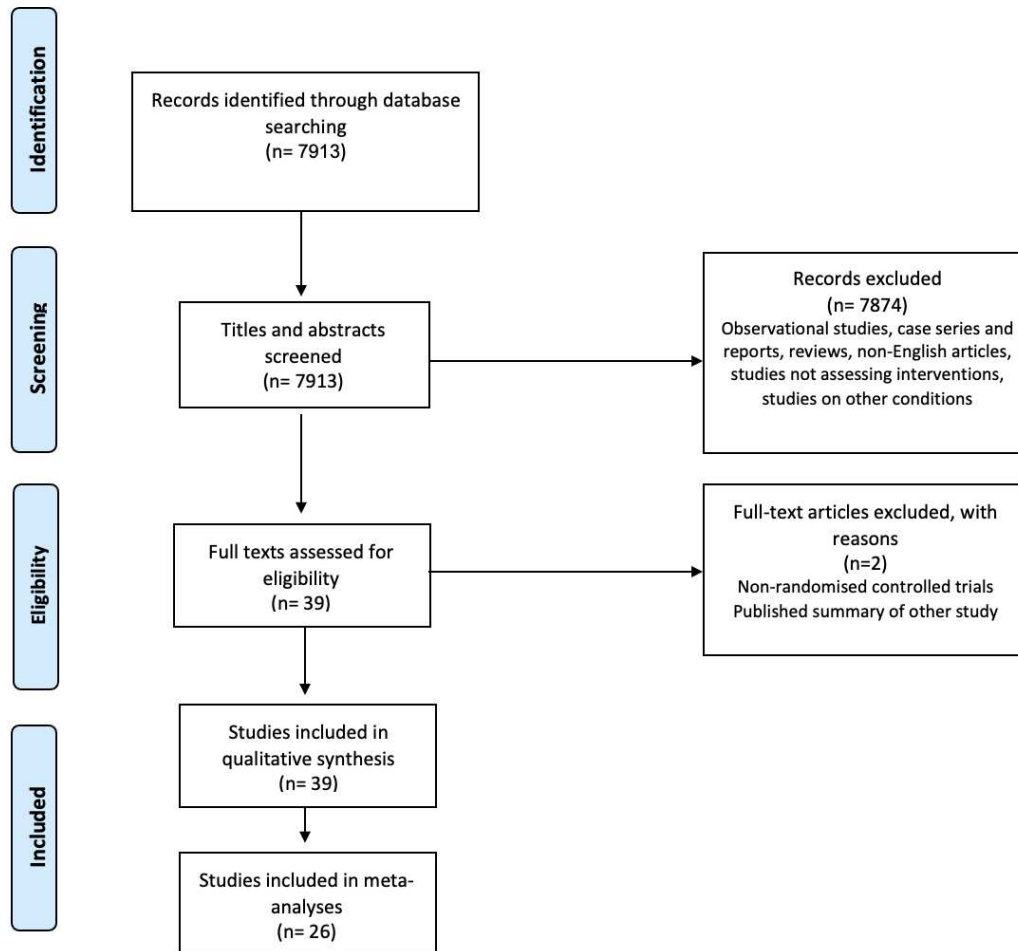

From: Moher D, Liberati A, Tetzlaff J, Altman DG, The PRISMA Group (2009). Preferred Reporting Items for Systematic Reviews and Meta-Analyses: The PRISMA Statement. PLoS Med 6(7): e1000097. doi:10.1371/journal.pmed1000097

**Suppl. Figure 1. PRISMA flowchart showing the article selection process**

**Suppl. Figure 2a&b. Network forest plots for all included interventions in the network meta-analysis for short-term pain VAS (2a) and VISA-P (2b).** A, eccentric exercise – decline squat; B, concentric exercise; C, focal extracorporeal shock-wave therapy + eccentric exercise; D, eccentric exercise - step squat; E, dry needling + eccentric exercise; F, platelet-rich plasma injection + eccentric exercise; G, percutaneous needle electrolysis + eccentric exercise; H, eccentric device; I, two platelet-rich plasma injections + eccentric exercise; J, corticosteroid injection; K, heavy slow resistance exercise; L, autologous blood injection + eccentric exercise; M, topical glyceryl trinitrate + eccentric exercise; N, radial extracorporeal shock-wave therapy + eccentric exercise; O, ultrasound therapy + eccentric exercise; P, hyaluronic acid injection + eccentric exercise; Q, moderate slow resistance exercise; R, progressive tendon loading; S, surgery; T, collagen-producing cells + eccentric exercise; U, no treatment.

2a

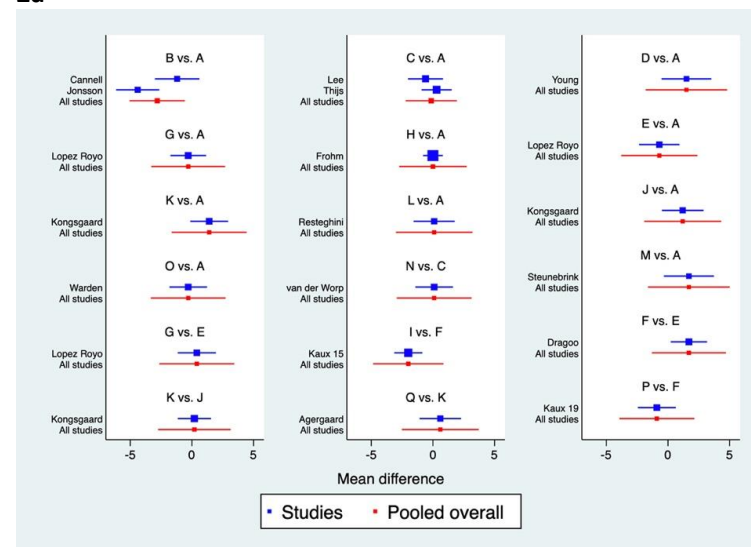

2b

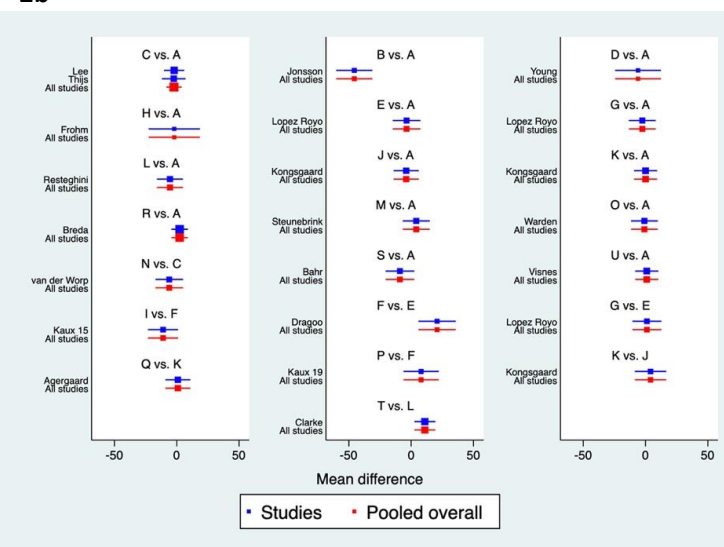

**Suppl. Figure 3a&b. Network rank line showing probabilities of each intervention ranking at each position for their effectiveness for short-term pain VAS (3a) and VISA-P (3b).**

A, eccentric exercise – decline squat; B, concentric exercise; C, focal extracorporeal shock-wave therapy + eccentric exercise; D, eccentric exercise - step squat; E, dry needling + eccentric exercise; F, platelet-rich plasma injection + eccentric exercise; G, percutaneous needle electrolysis + eccentric exercise; H, eccentric device; I, two platelet-rich plasma injections + eccentric exercise; J, corticosteroid injection; K, heavy slow resistance exercise; L, autologous blood injection + eccentric exercise; M, topical glyceryl trinitrate + eccentric exercise; N, radial extracorporeal shock-wave therapy + eccentric exercise; O, ultrasound therapy + eccentric exercise; P, hyaluronic acid injection + eccentric exercise; Q, moderate slow resistance exercise; R, progressive tendon loading; S, surgery; T, collagen-producing cells + eccentric exercise; U, no treatment.

**3a**

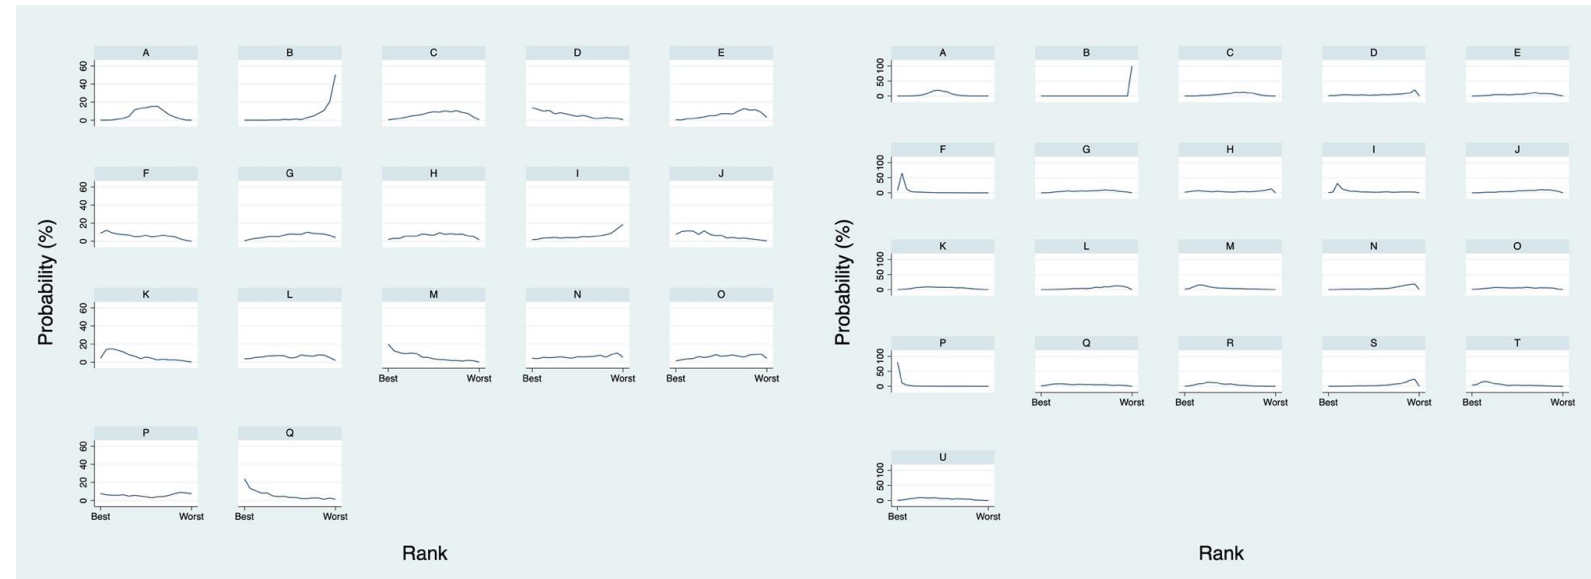

Supplement: bmjsem-2021-001110supp001.pdf [file bmjsem-2021-001110supp001.pdf]
